# Supplementary material for: Consistent population declines but idiosyncratic range shifts in Alpine orchids under global change
Source: PubMed Central journal article supplement (PMC7672077; doi:10.1038/s41467-020-19680-2), 2020-11-17
Supplement: 41467_2020_19680_MOESM1_ESM.pdf [file 41467_2020_19680_MOESM1_ESM.pdf]

1 **SUPPLEMENTARY INFORMATION**

2 **Consistent population declines but idiosyncratic range shifts in Alpine orchids under global change**

3 Costanza Geppert, Giorgio Perazza, Robert J. Wilson, Alessio Bertolli, Filippo Prosser, Giuseppe Melchiori,

4 Lorenzo Marini

5

6 Supplementary Figs. S1–2 and Supplementary Tables S1–4.

7 **SUPPLEMENTARY FIGURES**

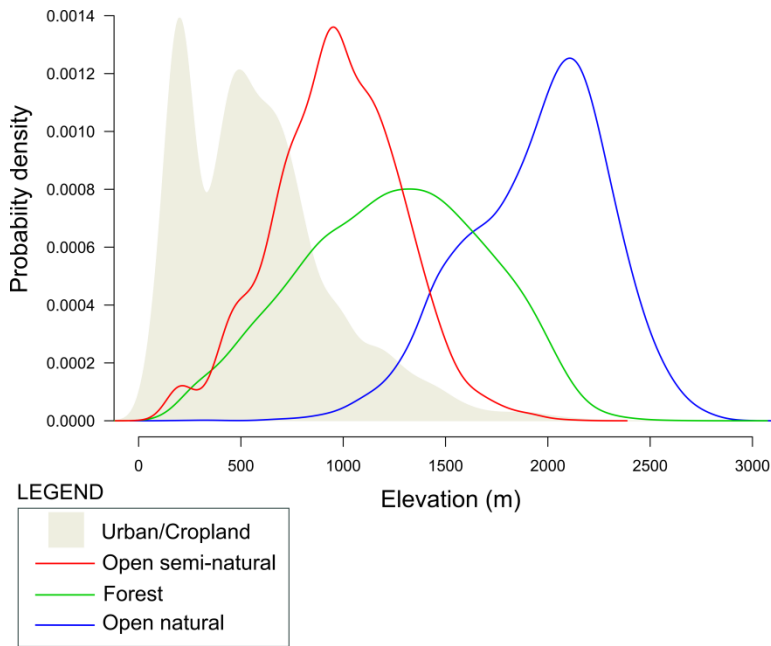

8

9 **Supplementary Figure 1** Density function of habitat availability at the regional scale over the elevational  
10 gradient. Data come from regional land-use maps. Wetlands did not present a clear elevational pattern, i.e.  
11 areas were more or less equally distributed across different elevations.

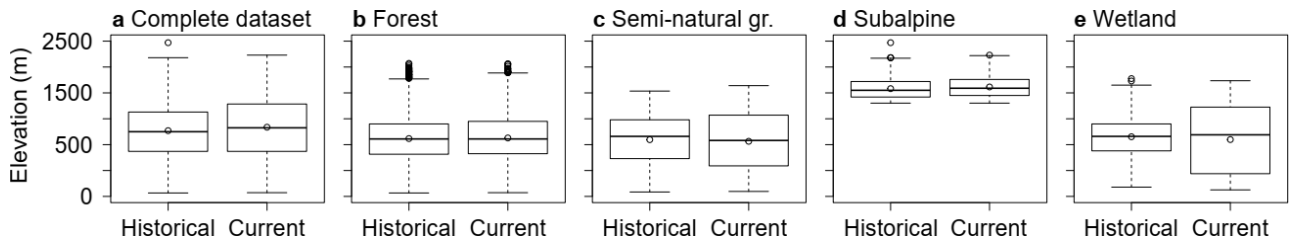

12

13 **Supplementary Figure 2** Sampling effort over the elevational gradient in both the historical (1990-2003)  
 14 and current (2004-2017) periods for the complete dataset and for each habitat type. Complete dataset: n =  
 15 10,293 historical sites, n = 11,308 current sites. Boxplots display minimum, maximum, median, first quartile,  
 16 and third quartile and were drawn using the default settings in the boxplot() function in R.

17 **SUPPLEMENTARY TABLES**

18 **Supplementary Table 1** List of the orchid species with the number of records in the historical (1990-2003)  
 19 and current (2004-2017) time periods, habitat preferences, min and max elevation reported in the dataset, and  
 20 threat category as indicated in the Italian Red List of Threatened Species\*. Red List categories as follows, in  
 21 increasing level of threat: NE – Not Evaluated; LC – Least Concern; NT – Near Threatened; VU –  
 22 Vulnerable; EN – Endangered. We followed Perazza & Lorenz (2013)<sup>34</sup> for the nomenclature of the species.  
 23 In the last column, we indicated if the species was included in the population dynamics and range shift  
 24 analyses (Hist) and/or resurvey analysis (Res).

| Species                          | Count<br>historical | Count<br>current | Habitat<br>preference | Elevation<br>(m) |      | Red list | Analysis  |
|----------------------------------|---------------------|------------------|-----------------------|------------------|------|----------|-----------|
|                                  |                     |                  |                       | Min              | Max  |          |           |
| <i>Anacamptis pyramidalis</i>    | 285                 | 282              | Semi-natural          | 85               | 1620 | NT       | Hist, Res |
| <i>Cephalanthera damasonium</i>  | 556                 | 547              | Forest                | 140              | 1650 | NE       | Hist, Res |
| <i>Cephalanthera longifolia</i>  | 1215                | 1100             | Generalist            | 95               | 2040 | NE       | Hist, Res |
| <i>Cephalanthera rubra</i>       | 428                 | 228              | Forest                | 125              | 1700 | NE       | Hist, Res |
| <i>Chamorchis alpina</i>         | 224                 | 163              | Subalpine             | 1580             | 2660 | NE       | Hist      |
| <i>Coeloglossum viride</i>       | 1285                | 1257             | Grassland             | 570              | 2970 | NE       | Hist, Res |
| <i>Corallorhiza trifida</i>      | 468                 | 187              | Forest                | 615              | 2150 | NE       | Hist, Res |
| <i>Cypripedium calceolus</i>     | 556                 | 259              | Generalist            | 380              | 2295 | LC       | Hist, Res |
| <i>Dactylorhiza fuchsii</i>      | 2840                | 3759             | Generalist            | 230              | 2450 | NE       | Hist, Res |
| <i>Dactylorhiza incarnata</i>    | 141                 | 51               | Wetland               | 179              | 1820 | VU       | Hist, Res |
| <i>Dactylorhiza lapponica</i>    | 94                  | 35               | Wetland               | 400              | 2145 | VU       | Hist, Res |
| <i>Dactylorhiza majalis</i>      | 66                  | 73               | Wetland               | 1156             | 2276 | NT       | Hist, Res |
| <i>Dactylorhiza sambucina</i>    | 521                 | 310              | Grassland             | 250              | 2220 | NE       | Hist      |
| <i>Epipactis atrorubens</i>      | 1580                | 1389             | Forest                | 160              | 2400 | NE       | Hist, Res |
| <i>Epipactis bugacensis</i>      | 0                   | 82               | Wetland               | 126              | 212  | NE       | Res       |
| <i>Epipactis helleborine</i>     | 1020                | 1083             | Forest                | 140              | 1890 | NE       | Hist, Res |
| <i>Epipactis muelleri</i>        | 158                 | 138              | Forest                | 184              | 1490 | NE       | Hist, Res |
| <i>Epipactis palustris</i>       | 132                 | 48               | Wetland               | 194              | 1610 | NT       | Hist, Res |
| <i>Epipogium aphyllum</i>        | 120                 | 78               | Forest                | 695              | 1850 | VU       | Hist      |
| <i>Goodyera repens</i>           | 848                 | 359              | Forest                | 250              | 1960 | NE       | Hist, Res |
| <i>Gymnadenia conopsea</i>       | 2286                | 1747             | Grassland             | 165              | 2620 | NE       | Hist, Res |
| <i>Gymnadenia odoratissima</i>   | 827                 | 622              | Grassland             | 100              | 2500 | NE       | Hist, Res |
| <i>Himantoglossum adriaticum</i> | 44                  | 203              | Semi-natural          | 270              | 1030 | VU       | Hist, Res |
| <i>Limodorum abortivum</i>       | 338                 | 267              | Forest                | 66               | 1180 | NE       | Hist, Res |
| <i>Liparis loeselii</i>          | 16                  | 13               | Wetland               | 437              | 1018 | EN       | Res       |
| <i>Listera cordata</i>           | 383                 | 252              | Forest                | 900              | 2130 | NE       | Hist, Res |
| <i>Listera ovata</i>             | 1472                | 950              | Generalist            | 100              | 2235 | NE       | Hist, Res |
| <i>Neottia nidus avis</i>        | 1392                | 1440             | Forest                | 140              | 1820 | NE       | Hist, Res |
| <i>Nigritella buschmanniae</i>   | 51                  | 93               | Subalpine             | 1880             | 2545 | NE       | Hist      |
| <i>Nigritella miniata</i>        | 195                 | 284              | Subalpine             | 1280             | 2690 | NT       | Hist      |
| <i>Nigritella rhellicani</i>     | 1179                | 1301             | Subalpine             | 1155             | 2720 | NE       | Hist, Res |
| <i>Ophrys apifera</i>            | 22                  | 70               | Semi-natural          | 98               | 890  | NT       | Res       |
| <i>Ophrys bertolonii</i>         | 70                  | 55               | Semi-natural          | 100              | 820  | EN       | Hist, Res |
| <i>Ophrys holosericea</i>        | 57                  | 106              | Semi-natural          | 145              | 1020 | VU       | Hist, Res |
| <i>Ophrys insectifera</i>        | 280                 | 173              | Generalist            | 200              | 2100 | NE       | Hist, Res |
| <i>Ophrys sphegodes</i>          | 175                 | 134              | Semi-natural          | 85               | 950  | NT       | Hist, Res |

|                               |      |      |              |     |      |    |           |
|-------------------------------|------|------|--------------|-----|------|----|-----------|
| <i>Orchis coriophora</i>      | 29   | 6    | Semi-natural | 540 | 1330 | NE | Res       |
| <i>Orchis mascula</i>         | 408  | 223  | Generalist   | 240 | 2570 | NE | Hist, Res |
| <i>Orchis militaris</i>       | 389  | 174  | Semi-natural | 100 | 2140 | NT | Hist, Res |
| <i>Orchis morio</i>           | 276  | 188  | Semi-natural | 90  | 1470 | NT | Hist, Res |
| <i>Orchis purpurea</i>        | 121  | 196  | Generalist   | 140 | 1500 | NT | Hist, Res |
| <i>Orchis simia</i>           | 76   | 63   | Semi-natural | 90  | 1040 | NT | Hist, Res |
| <i>Orchis tridentata</i>      | 429  | 224  | Semi-natural | 98  | 1540 | NE | Hist, Res |
| <i>Orchis ustulata</i>        | 328  | 115  | Grassland    | 215 | 2050 | NE | Hist, Res |
| <i>Platanthera bifolia</i>    | 1313 | 1048 | Generalist   | 180 | 2480 | NE | Hist, Res |
| <i>Platanthera chlorantha</i> | 200  | 67   | Generalist   | 250 | 1700 | NE | Hist, Res |
| <i>Pseudorchis albida</i>     | 977  | 1210 | Subalpine    | 900 | 2705 | NE | Hist, Res |
| <i>Spiranthes spiralis</i>    | 14   | 32   | Semi-natural | 90  | 790  | NE | Res       |
| <i>Traunsteinera globosa</i>  | 578  | 441  | Grassland    | 375 | 2560 | NE | Hist      |

25 \*IUCN & Società Botanica Italiana. Lista rossa della flora Italiana. 58 (2013).

26 **Supplementary Table 2** Effect of time (difference in years between the two surveys), historical population  
 27 size, habitat preference, elevation, and habitat alteration (yes and no) on the probability that the orchid  
 28 population survived until the resurvey. We fitted generalized linear mixed models assuming a binomial  
 29 distribution with species as random factor (see Methods). Elevation was standardized to mean 0 and SD 1 to  
 30 make elevational ranges comparable among species.

|                        | <b>Estimate</b> | <b>SE</b> | <b>t</b> | <b>p</b> |
|------------------------|-----------------|-----------|----------|----------|
| Time                   | -0.094          | 0.086     | -1.104   | 0.269    |
| log (Size)             | 0.521           | 0.088     | 5.932    | <0.001   |
| Generalist             | 0.140           | 0.254     | 0.551    | 0.582    |
| Grassland              | -0.758          | 0.386     | -1.962   | 0.050    |
| Semi-natural grassland | -0.413          | 0.258     | -1.602   | 0.109    |
| Subalpine              | -0.386          | 0.496     | -0.778   | 0.437    |
| Wetland                | -0.148          | 0.388     | -0.380   | 0.704    |
| Elevation              | 0.274           | 0.092     | 2.984    | 0.003    |
| Habitat alteration     | -0.539          | 0.174     | -3.098   | 0.002    |

31

32 **Supplementary Table 3** Effect of time (year 1990-2017), elevation and their interaction on population size  
 33 within each habitat preference category. Elevation was standardized to mean 0 and SD 1 to make elevational  
 34 ranges comparable among species. We fitted generalized linear mixed models assuming a Poisson  
 35 distribution with species and OLRE as random effects (see Methods). All variables were scaled.

|                        | <b>Fixed factor</b>    | <b>Estimate</b> | <b>SE</b> | <b>t</b> | <b>p</b> |
|------------------------|------------------------|-----------------|-----------|----------|----------|
| Forest                 | Elevation <sup>2</sup> | -0.123          | 0.012     | -10.546  | <0.001   |
|                        | Elevation              | 0.028           | 0.012     | 2.418    | 0.016    |
|                        | Time                   | -0.163          | 0.012     | -14.074  | <0.001   |
|                        | Elevation x Time       | 0.036           | 0.012     | 3.098    | 0.002    |
| Generalist             | Elevation <sup>2</sup> | -0.212          | 0.013     | -16.879  | <0.001   |
|                        | Elevation              | -0.093          | 0.012     | -7.479   | <0.001   |
|                        | Time                   | -0.222          | 0.013     | -17.610  | <0.001   |
|                        | Elevation x Time       | 0.023           | 0.013     | 1.841    | 0.066    |
| Grassland              | Elevation <sup>2</sup> | -0.236          | 0.020     | -11.890  | <0.001   |
|                        | Elevation              | 0.123           | 0.019     | 6.403    | <0.001   |
|                        | Time                   | -0.140          | 0.019     | -7.515   | <0.001   |
|                        | Elevation x Time       | 0.048           | 0.019     | 2.532    | 0.011    |
| Semi-natural grassland | Elevation <sup>2</sup> | -0.095          | 0.030     | -3.129   | 0.002    |
|                        | Elevation              | -0.172          | 0.030     | -5.763   | <0.001   |
|                        | Time                   | 0.023           | 0.030     | 0.749    | 0.454    |
|                        | Elevation x Time       | 0.016           | 0.031     | 0.511    | 0.609    |
| Subalpine              | Elevation <sup>2</sup> | -0.175          | 0.026     | -6.807   | <0.001   |
|                        | Elevation              | 0.066           | 0.025     | 2.690    | 0.007    |
|                        | Time                   | -0.253          | 0.025     | -10.266  | <0.001   |
|                        | Elevation x Time       | 0.049           | 0.024     | 2.022    | 0.043    |
| Wetland                | Elevation <sup>2</sup> | -0.136          | 0.074     | -1.836   | 0.066    |
|                        | Elevation              | 0.106           | 0.073     | 1.451    | 0.147    |
|                        | Time                   | 0.015           | 0.074     | 0.204    | 0.839    |
|                        | Elevation x Time       | 0.086           | 0.075     | 1.153    | 0.249    |

36

37 **Supplementary Table 4** Range shifts (m year<sup>-1</sup>) calculated on resurveyed species with at least 10 records per  
 38 survey.

| <b>Species</b>                   | <b>Rear<br/>edge</b> | <b>Optimum</b> | <b>Leading<br/>edge</b> | <b>Count<br/>Initial<br/>survey</b> | <b>Count<br/>Second<br/>survey</b> |
|----------------------------------|----------------------|----------------|-------------------------|-------------------------------------|------------------------------------|
| <i>Anacamptis pyramidalis</i>    | 2.307                | 3.402          | -4.566                  | 52                                  | 38                                 |
| <i>Cephalanthera damasonium</i>  | 1.19                 | 1.826          | -4.583                  | 28                                  | 30                                 |
| <i>Cephalanthera longifolia</i>  | -0.758               | 10.343         | -9.273                  | 74                                  | 46                                 |
| <i>Cephalanthera rubra</i>       | 8.284                | 6.285          | 2.334                   | 24                                  | 18                                 |
| <i>Coeloglossum viride</i>       | 25.528               | 29.605         | 4.376                   | 27                                  | 12                                 |
| <i>Dactylorhiza fuchsii</i>      | 2.958                | -1.234         | -3.614                  | 96                                  | 76                                 |
| <i>Dactylorhiza incarnata</i>    | 2.915                | 2.334          | 8.177                   | 40                                  | 19                                 |
| <i>Epipactis atrorubens</i>      | 3.403                | 3.666          | 6.354                   | 56                                  | 36                                 |
| <i>Epipactis helleborine</i>     | -0.597               | 26.613         | -4.22                   | 56                                  | 45                                 |
| <i>Gymnadenia conopsea</i>       | 15.101               | 42.903         | -2.055                  | 80                                  | 45                                 |
| <i>Himantoglossum adriaticum</i> | -7.841               | -4.428         | 1.398                   | 26                                  | 13                                 |
| <i>Limodorum abortivum</i>       | 1.093                | 0.201          | -13.158                 | 37                                  | 26                                 |
| <i>Listera ovata</i>             | -1.932               | 0.529          | 8.231                   | 50                                  | 43                                 |
| <i>Neottia nidus avis</i>        | 6.049                | 23.805         | 0.643                   | 60                                  | 38                                 |
| <i>Nigritella rhellicani</i>     | 2.878                | 2.748          | 7.459                   | 25                                  | 16                                 |
| <i>Orchis morio</i>              | -2.582               | -3.048         | -7.309                  | 54                                  | 22                                 |
| <i>Orchis purpurea</i>           | 9.324                | 7.405          | -8.974                  | 14                                  | 10                                 |
| <i>Orchis tridentata</i>         | -2.068               | 12.285         | -1.235                  | 47                                  | 25                                 |
| <i>Platanthera bifolia</i>       | 5.761                | 1.688          | -8.362                  | 64                                  | 24                                 |
| <i>Pseudorchis albida</i>        | 14.562               | -1.699         | 2.381                   | 29                                  | 14                                 |

39

40
